# Supplementary material
Source: Springer Nature journal article supplement (https://www.springermedizin.de/resource/supplementary/12874_2012_914_MOESM8_ESM.pdf/9433050)

# Breast Cancer

## Cumulative Incidence Function

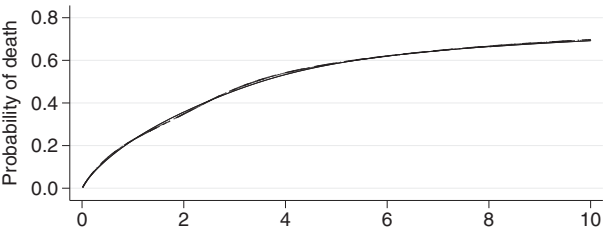

## Cause-specific Hazard

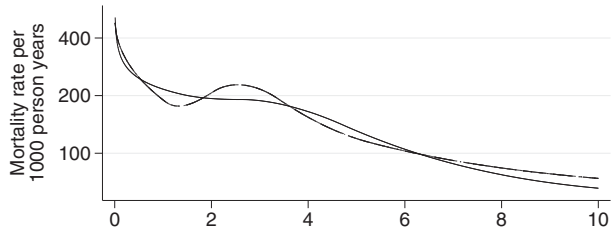

# Other Cancer

## Cumulative Incidence Function

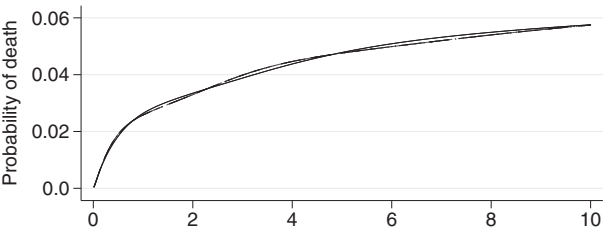

## Cause-specific Hazard

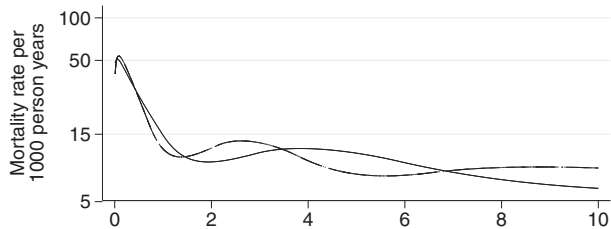

Time since diagnosis (years)

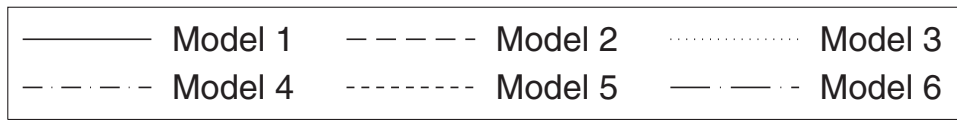

Supplement: MOESM8 [file 9433050]
